# Supplementary material for: Urine TERT promoter mutations-based tumor DNA detection in patients with bladder cancer: A pilot study
Source: PubMed Central journal article supplement — Mol Clin Oncol. 2021 Oct 8;15(6):253. doi: 10.3892/mco.2021.2415 (PMC8548999; doi:10.3892/mco.2021.2415), 2021-10-08
Supplement: Supplementary_Data.pdf [file Supplementary_Data.pdf]

Figure S1. False-positive droplets threshold determination for: (A) TERT promoter mutation C228T; and (B) TERT promoter mutation C250T. TERT, telomerase reverse transcriptase.

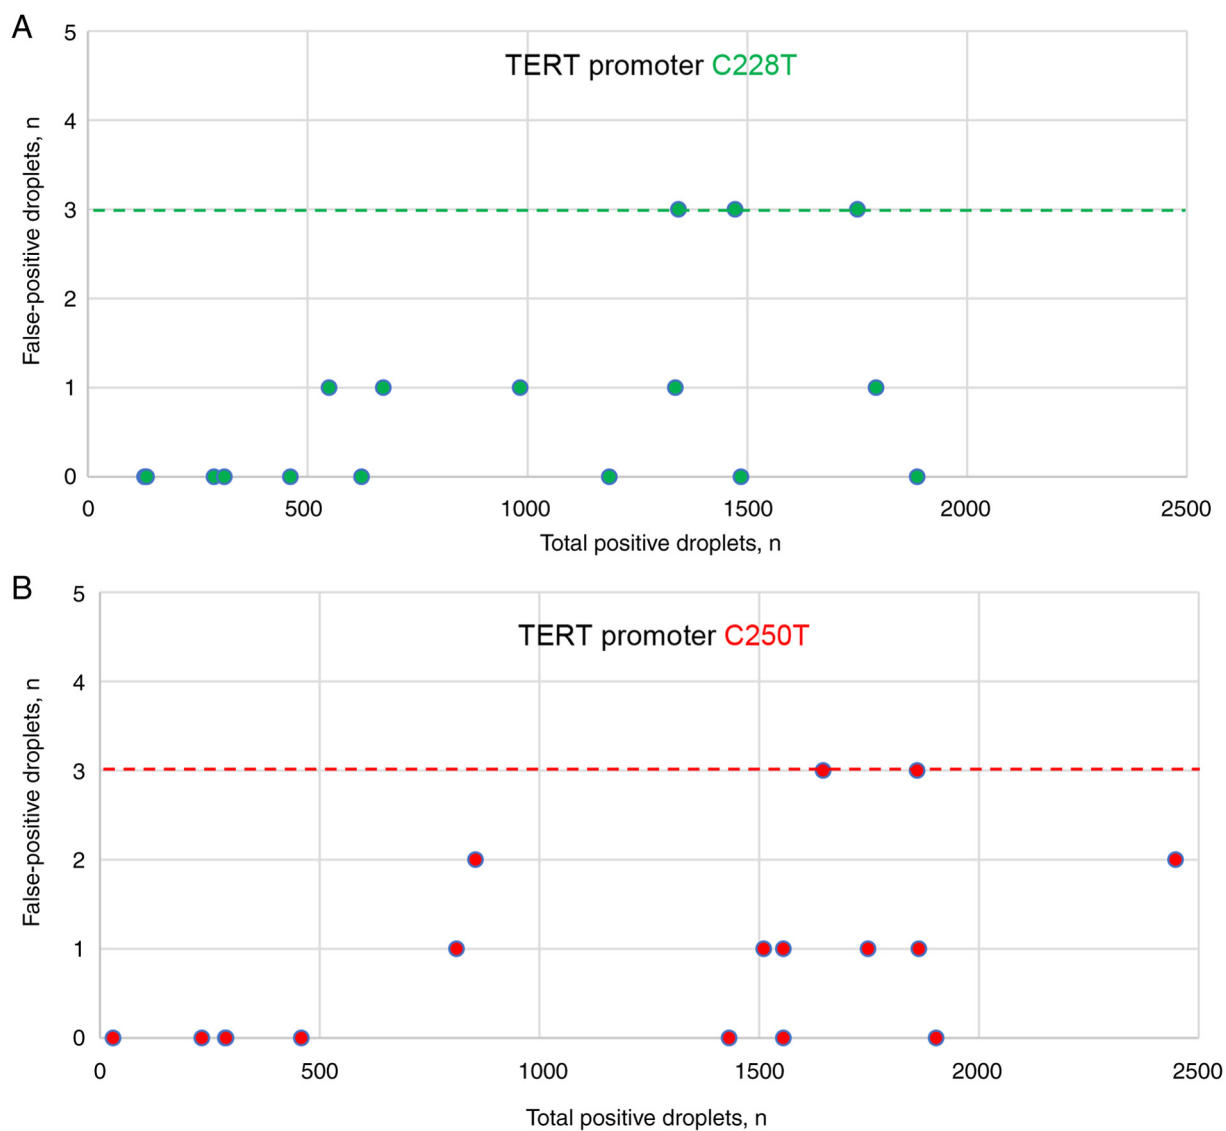

Figure S2. Determination of the linearity of the TERT promoter mutation quantitative analysis. (A) TERT promoter mutation C228T assay; and (B) TERT promoter mutation C250T assay. MAF, minor allele frequency; TERT, telomerase reverse transcriptase. \*Linear correlation coefficient value.

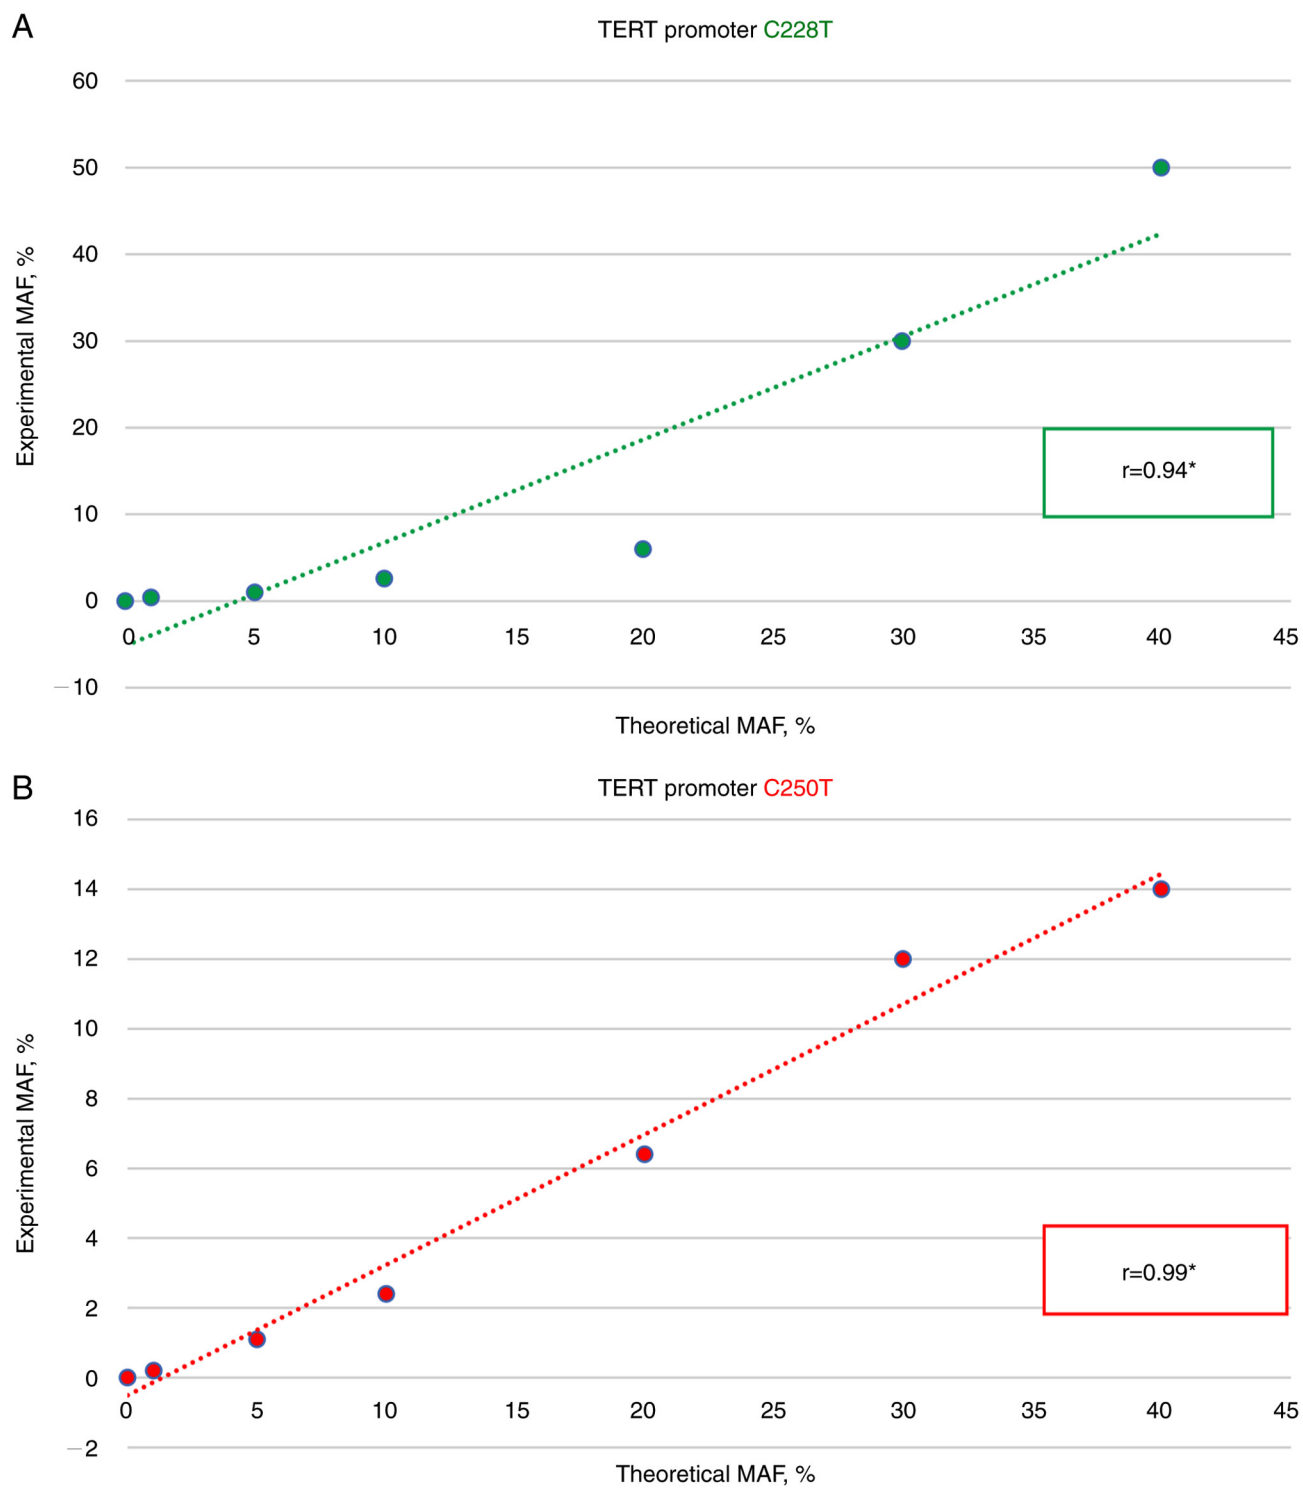

Figure S3. Examples of digital droplet PCR outcome: (A) Patient with low levels of urine DNA; (B) patient with high levels of urine DNA.

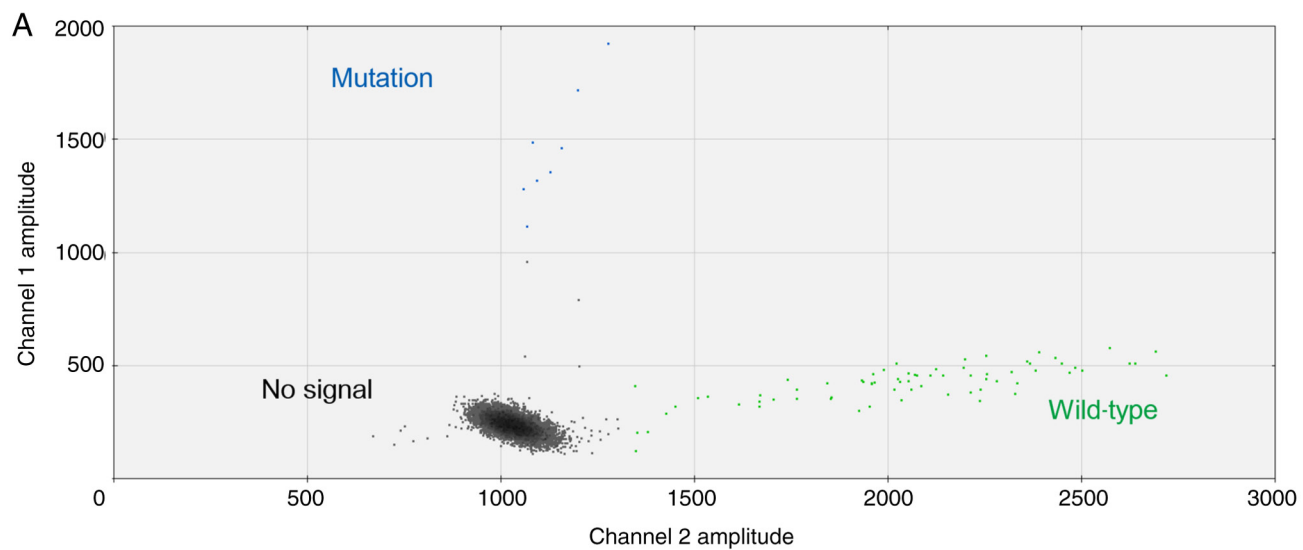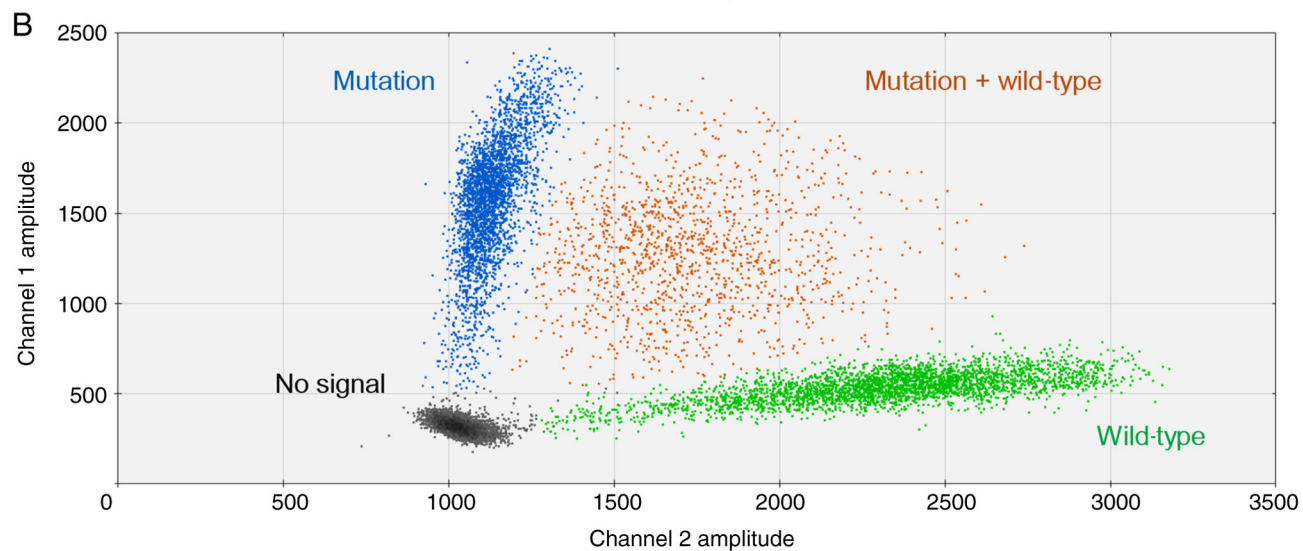

Table SI. Results of urine TERT promoter C228T and C250T detection in each clinical sample.

| Sample ID | Bladder cancer status | C228T fraction <sup>a</sup> , % | C250T fraction <sup>a</sup> , % |
|-----------|-----------------------|---------------------------------|---------------------------------|
| 1T        | Positive              | 33.10                           | 0                               |
| 3T        | Positive              | 3.55                            | 1.03                            |
| 4T        | Positive              | 0                               | 0                               |
| 5T        | Positive              | 0                               | 0                               |
| 7T        | Positive              | 8.41                            | 0                               |
| 8T        | Positive              | 48.77                           | 0                               |
| 11T       | Positive              | 49.76                           | 0                               |
| 13T       | Positive              | 0                               | 31.39                           |
| 14T       | Positive              | 0                               | 0                               |
| 16T       | Positive              | 29.46                           | 1.93                            |
| 19T       | Positive              | 0                               | 0                               |
| 20T       | Positive              | 27.76                           | 0.02 <sup>b</sup>               |
| 24T       | Positive              | 30.79                           | 0                               |
| 25T       | Positive              | 10.77                           | 0                               |
| 26T       | Positive              | 0                               | 0                               |
| 29T       | Positive              | 0                               | 0                               |
| 31T       | Positive              | 0                               | 0                               |
| 37T       | Positive              | 25.27                           | 0                               |
| 38T       | Positive              | 19.64                           | 0                               |
| 42T       | Positive              | 0                               | 0                               |
| 43T       | Positive              | 5.41                            | 0                               |
| 44T       | Positive              | 0.45                            | 0.59                            |
| 51T       | Positive              | 0                               | 0                               |
| 52T       | Positive              | 2.29                            | 0                               |
| 53T       | Positive              | 0                               | 0                               |
| 54T       | Positive              | 0                               | 0                               |
| 59T       | Positive              | 0                               | 0                               |
| 1K        | Negative              | 0                               | 0                               |
| 2K        | Negative              | 0                               | 0                               |
| 3K        | Negative              | 0                               | 0                               |
| 4K        | Negative              | 0                               | 0                               |
| 5K        | Negative              | 0                               | 0                               |
| 6K        | Negative              | 0                               | 0                               |
| 7K        | Negative              | 0                               | 0                               |
| 8K        | Negative              | 0                               | 0                               |
| 9K        | Negative              | 0                               | 0                               |
| 10K       | Negative              | 0                               | 0                               |
| 11K       | Negative              | 0                               | 0                               |
| 12K       | Negative              | 0                               | 0                               |
| 2S        | Negative              | 0                               | 0                               |
| 6S        | Negative              | 0                               | 0                               |
| 10S       | Negative              | 0                               | 0.08 <sup>b</sup>               |
| 17S       | Negative              | 0                               | 0                               |
| 22S       | Negative              | 0                               | 0                               |
| 23S       | Negative              | 0                               | 0                               |
| 30S       | Negative              | 0                               | 0                               |
| 33S       | Negative              | 0                               | 0                               |
| 39S       | Negative              | 0                               | 0                               |
| 55S       | Negative              | 0                               | 0                               |
| 58S       | Negative              | 0                               | 0                               |
| 15L       | Post-resection        | 0                               | 0                               |
| 21L       | Post-resection        | 0                               | 0                               |
| 28L       | Post-resection        | 0                               | 0                               |
| 32L       | Post-resection        | 0                               | 0                               |
| 34L       | Post-resection        | 6.61                            | 0                               |
| 35L       | Post-resection        | 2.48                            | 0                               |

Table SI. Continued.

| Sample ID | Bladder cancerstatus | C228T fraction <sup>a</sup> , % | C250T fraction <sup>a</sup> , % |
|-----------|----------------------|---------------------------------|---------------------------------|
| 35L       | Post-resection       | 2.48                            | 0                               |
| 40L       | Post-resection       | 0                               | 1.94                            |
| 41L       | Post-resection       | 0                               | 0                               |
| 56L       | Post-resection       | 0.9                             | 0                               |
| 57L       | Post-resection       | 0                               | 0                               |

<sup>a</sup>Fraction of urine tumor DNA determined by means of TERT promoter mutations C228T and C250T analysis.<sup>b</sup>Tumor DNA fraction did not exceed the calculated cut-off value of 0.3%, thus the sample was considered as mutation-negative. TERT, telomerase reverse transcriptase.
